# Supplementary material for: Wet electrospun silk fibroin/gold nanoparticle 3D matrices for wound healing applications
Source: Royal Society of Chemistry journal article supplement (doi:10.1039/c5ra24225h), 2016-01-01
Supplement: c5ra24225h1.pdf [file c5ra24225h1.pdf]

**Table 1.** The scoring system of epithelialization

| <b>Scores</b> | <b>Epithelialization Degree</b>                              |
|---------------|--------------------------------------------------------------|
| 0             | No epithelialization, superficial ulcers                     |
| 1             | Incomplete re-epithelialization, focal epidermal hyperplasia |
| 2             | Complete re-epithelialization                                |

**Table 2.** The inflammation scoring system

---

| <b>Scores</b> | <b>Inflammation Degree</b>                                                               |
|---------------|------------------------------------------------------------------------------------------|
| <b>0</b>      | No inflammation                                                                          |
| <b>1</b>      | Few lymphocytes, plasma cells and giant cells in dermis                                  |
| <b>2</b>      | Vascular proliferation, eosinophils, plasma cells, neutrophils and giant cells in dermis |
| <b>3</b>      | Many inflammatory cells, significant vascular proliferation, micro-abscess formation     |

---

**Table 3.** The neovascularization scoring system

| <b>Scores</b> | <b>Degree of neovascularization</b> |
|---------------|-------------------------------------|
| <b>0</b>      | No vascularization                  |
| <b>1</b>      | Mild and weak                       |
| <b>2</b>      | Moderate intensity                  |
| <b>3</b>      | Severe and intense                  |

**Table 4.** The granulation tissue formation scoring system

| <b>Scores</b> | <b>Degree of granulation</b> |
|---------------|------------------------------|
| <b>0</b>      | No granulation               |
| <b>1</b>      | Mild and weak                |
| <b>2</b>      | Moderate intensity           |
| <b>3</b>      | Severe and intense           |
